# Supplementary material for: Hierarchically controlled protonation/aggregation of a porphyrin–spermine derivative
Source: Royal Society of Chemistry journal article supplement (doi:10.1039/c5nj01264c), 2015-01-01
Supplement: c5nj01264c1.pdf [file c5nj01264c1.pdf]

**New Journal of Chemistry**  
**Electronic Supplementary Information**

**Hierarchically controlled protonation/aggregation of a porphyrin–  
spermine derivative.**

C. M. A. Gangemi,<sup>a</sup> R. Randazzo,<sup>a</sup> M. E. Fragalà,<sup>a</sup> G. Tomaselli,<sup>a</sup> F.P. Ballistreri,<sup>a</sup> A. Pappalardo,<sup>a</sup> R. M. Toscano,<sup>a</sup> G. Trusso Sfrazzetto,<sup>a</sup> R. Purrello,<sup>a\*</sup> and A. D'Urso,<sup>a\*</sup>

**General experimental methods.**

All stock solutions of H<sub>2</sub>TCPPSpm4 were prepared dissolving the solid in ultrapure water obtained from Elga Purelab Flex system by Veolia, at pH 1 for HCl, in order to achieve concentrations ranging from 2x10<sup>-4</sup>M to 3x10<sup>-4</sup>M. The concentration of these stock solutions was checked by spectrophotometric experiments using  $\epsilon_{\lambda 435\text{nm}} = 338000 \text{ M}^{-1}\text{cm}^{-1}$  at pH=1. To prepare independent solutions we dilute in several cuvettes at different pH, the calculated amount of H<sub>2</sub>TCPPSpm4 stock solution to obtain in each cuvettes 2  $\mu\text{M}$  work solutions. As soon as we prepared the solution, we recorded the spectrum. For the continuous titration we dilute the calculated amount of stock solution to obtain 2  $\mu\text{M}$  work solution, at pH 1. Then, every 15 minutes, we added small amounts of NaOH to increase the pH of the solution and performed the spectrum. A JASCO V-560 UV-vis spectrophotometer equipped with a 1 cm path-length cell was used for the UV-vis measurements. For RLS and fluorescence data, a fluorolog FL-11 Jobin-Yvon Horiba was used. SEM analysis of H<sub>2</sub>TCPPSpm4 drop casted on silicon substrates at different pHs, has been performed by using a Field Emission Scanning Electron Microscope (Zeiss Supra 55VP). The EDS analysis has been performed using an Oxford x-Act 10 mm<sup>2</sup> SSD detector.

The NMR experiments were carried out at 27° C on a Varian UNITY Inova 500 MHz spectrometer (<sup>1</sup>H at 499.88 MHz, <sup>13</sup>C-NMR at 125.7 MHz) equipped with pulse field gradient module (Z axis) and a tuneable 5 mm Varian inverse detection probe (ID-PFG). ESI mass spectra were acquired on an ES-MS Thermo-Finnigan LCQ-DECA using MeOH (positive ion mode). Positive MALDI-TOF mass spectra were acquired by a Voyager DE (PerSeptive Biosystem) equipped with a nitrogen laser (emission at 337 nm for 3 ns) and a flash AD converter (time base 2 ns). All of the chemicals were purchased from Sigma-Aldrich and used without further purification, H<sub>2</sub>TCPP was purchased from Frontier Scientific and used as received. Ultra-pure water (18.2 M) was used in all experiments.

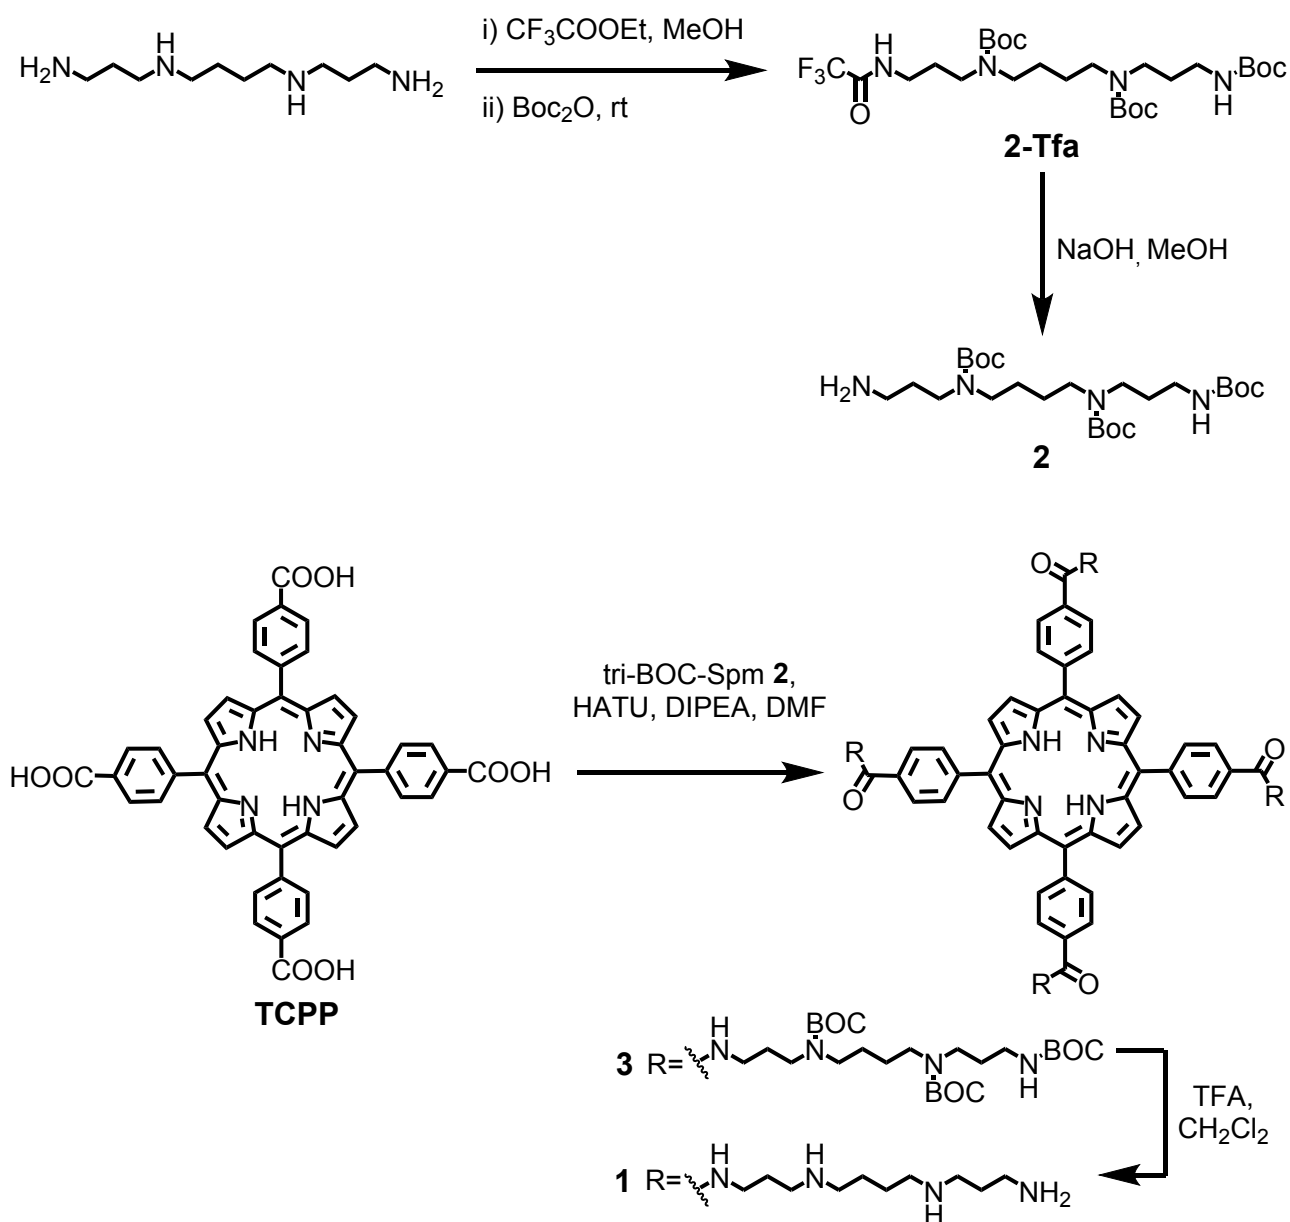

### Synthesis of tri-BOC-Spm (**2**)

Compound **2** was obtained by a modified literature method [1] with a two-step procedure as shown in Scheme 1.

### Synthesis of **2-Tfa**

A solution of Spermine (2.123 g, 10.5 mmol) in MeOH (120 mL) was stirred under nitrogen at -78 °C. After 10 min, ethyl trifluoroacetate (1.24 mL, 10.5 mmol) was added dropwise over 1 hour and the temperature was slowly increased to 0 °C. Then a solution of Boc<sub>2</sub>O (11.46 g, 52.5 mmol) in MeOH (10 mL) was added to reaction mixture during which temperature was brought back to 25 °C. After 24 h, the solvent was removed under reduced pressure and the residue was extracted with dichloromethane. The organic phase was washed with H<sub>2</sub>O and then dried over anhydrous Na<sub>2</sub>SO<sub>4</sub>. The product was purified by column chromatography (EtOAc) to give the desired compound (**2-Tfa**) as a yellow oil (3.1 g, 49% yield). <sup>1</sup>H NMR (500 MHz, acetone-*d*<sub>6</sub>): δ 8.54 (br s, 1H); 5.95 (br s, 1H); 3.34-3.24 (m, 10H); 3.07 (m, 2H); 1.82 (br s, 2H); 1.69 (br s, 2H); 1.54-1.41 (m, 31H) ppm. <sup>13</sup>C NMR (126 MHz, acetone-*d*<sub>6</sub>): δ 155.7, 155.2, 146.7, 116.2, 84.8, 78.4, 77.5, 46.7, 44.0, 37.5, 36.6, 27.7, 27.6, 26.5, 25.5 ppm.

### Synthesis of tri-BOC-Spm (2)

The trifluoroacetate protecting group of **2-Tfa** (1.41 g, 2.35 mmol in 5 mL MeOH) was removed with NaOH after stirring for 15 h at room temperature. The solution was concentrated in vacuum and the residue was extracted with dichloromethane. The organic phase was washed with H<sub>2</sub>O and then dried over anhydrous Na<sub>2</sub>SO<sub>4</sub>. The solvent was removed under reduced pressure to give the desired product **2** as a yellow oil (1.089 g, 92% yield). <sup>1</sup>H NMR (500 MHz, acetone-*d*<sub>6</sub>): δ 5.98 (br s, 1H), 3.30-3.23 (m, 8H), 3.17 (t, *J* = 7.0 Hz, 2H), 3.08 (m, 2H), 1.80 (m, 2H), 1.70 (br s, 2H), 1.53 (br s, 4H), 1.46 -1.41 (m, 27H) ppm.; ESI-MS: Mass Calcd. for C<sub>25</sub>H<sub>51</sub>N<sub>4</sub>O<sub>6</sub> 503.38. Found *m/z* = 503.4 [M+H]<sup>+</sup>.

### Synthesis of 3

To a solution of H<sub>2</sub>TCPP (200 mg, 0.252 mmol) in dry DMF (2 mL), a solution of HATU (445 mg, 1.17 mmol in 1 mL of DMF) was added dropwise and stirred for 20 min at room temperature under N<sub>2</sub> atmosphere. Then a solution of **2** (510 mg, 1.02 mmol) in dry DMF (2 mL) was added to the reaction mixture. After 40 min *N,N*-diisopropylethylamine (200 μL, 1.17 mmol) was added to the reaction, which was stirred for 24 h at rt. The solvent was removed under reduced pressure and CH<sub>2</sub>Cl<sub>2</sub> was added obtaining a precipitate that was removed by filtration. The resulting solution was concentrated under vacuum and purified by column chromatography (CH<sub>2</sub>Cl<sub>2</sub>/EtOH 90:10) to afford the desired compound **3** as a purple powder (107.6 mg, 16% yield). <sup>1</sup>H NMR (500 MHz, CDCl<sub>3</sub>): δ 8.84 (s, 8H), 8.31 (br s, 16H), 3.63-3.00 (br s, 48H), 1.91 (br s, 8H), 1.69 (br s, 8H), 1.55-1.28 (m, 124 H), -2.72 (s, 2H) ppm. <sup>13</sup>C NMR (126 MHz, CDCl<sub>3</sub>) 134.5, 125.5, 80.1, 79.6, 55.5, 46.8, 43.5, 37.5, 28.5, 28.47, 28.43, 27.7 ppm. MALDI: Mass Calcd. for C<sub>148</sub>H<sub>223</sub>N<sub>20</sub>O<sub>28</sub> 2728.66. Found *m/z* 2728.92 [M+H]<sup>+</sup>

### Synthesis of 1

To a solution of **3** in CH<sub>2</sub>Cl<sub>2</sub> (0.04 mmol in 1.5 mL), TFA (20 eq.) was added dropwise under nitrogen and the reaction was stirred at rt for 2h. The reaction was monitored by TLC (CH<sub>2</sub>Cl<sub>2</sub>/EtOH 90:10) and the solvent was removed under reduced pressure affording the corresponding trifluoroacetate salt compound **1** as a green-purple solid in nearly quantitative yield. <sup>1</sup>H NMR (500 MHz, CD<sub>3</sub>OD): δ 8.88 (br, s, 8H), 8.37 (d, *J* = 8.0 Hz, 8H), 8.33 (d, *J* = 8.0 Hz, 8H), 3.71 (br, s, 8H), 3.26-3.06 (m, 40H), 2.19-2.09 (m, 16H), 1.91 (br, s, 16H) ppm. <sup>13</sup>C NMR (126 MHz, CD<sub>3</sub>OD): δ 170.8, 136.4, 135.2, 127.3, 146.5, 121.4, 46.6, 45.8, 37.8, 27.8, 25.3, 24.4, 24.3 ppm. ESI-MS: Mass Calcd. for C<sub>88</sub>H<sub>127</sub>N<sub>20</sub>O<sub>4</sub> 1528.03. Found *m/z* 1527.7 [M+H]<sup>+</sup> (100%), 1453.7 [M-(C<sub>3</sub>H<sub>9</sub>N<sub>2</sub>)]<sup>+</sup>, 1399.6 [M-(C<sub>7</sub>H<sub>17</sub>N<sub>2</sub>)]<sup>+</sup>, 1325.6 [M-(C<sub>10</sub>H<sub>26</sub>N<sub>4</sub>)]<sup>+</sup>.

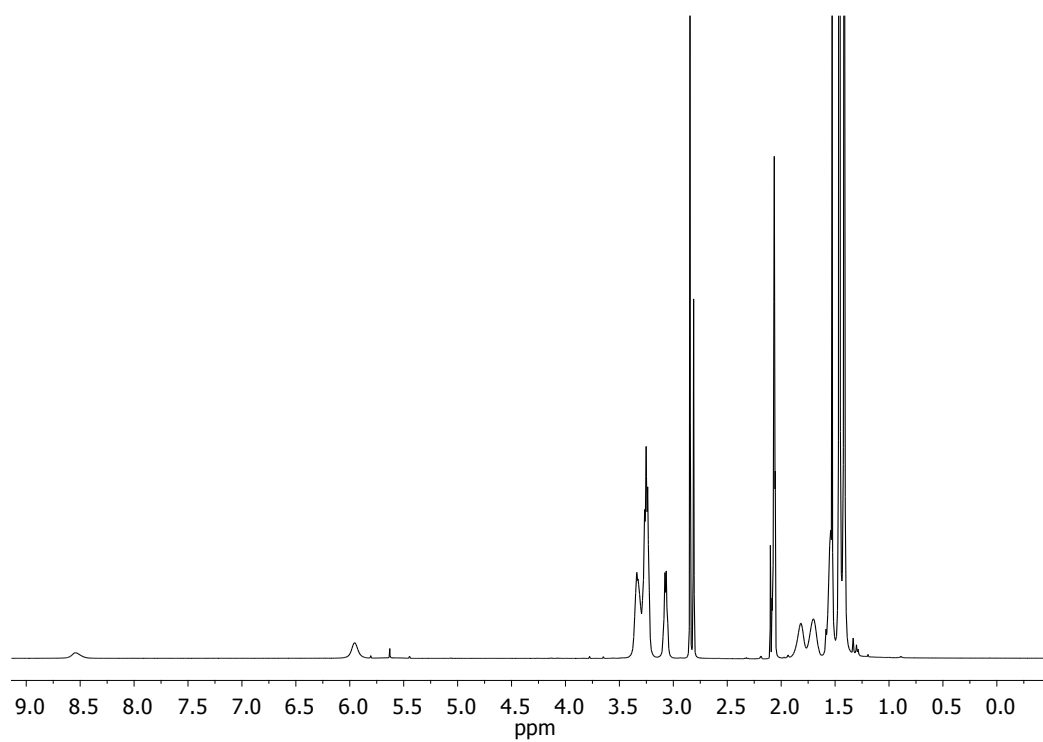

$^1\text{H}$ -NMR of compound **2-Tfa** in acetone- $d_6$

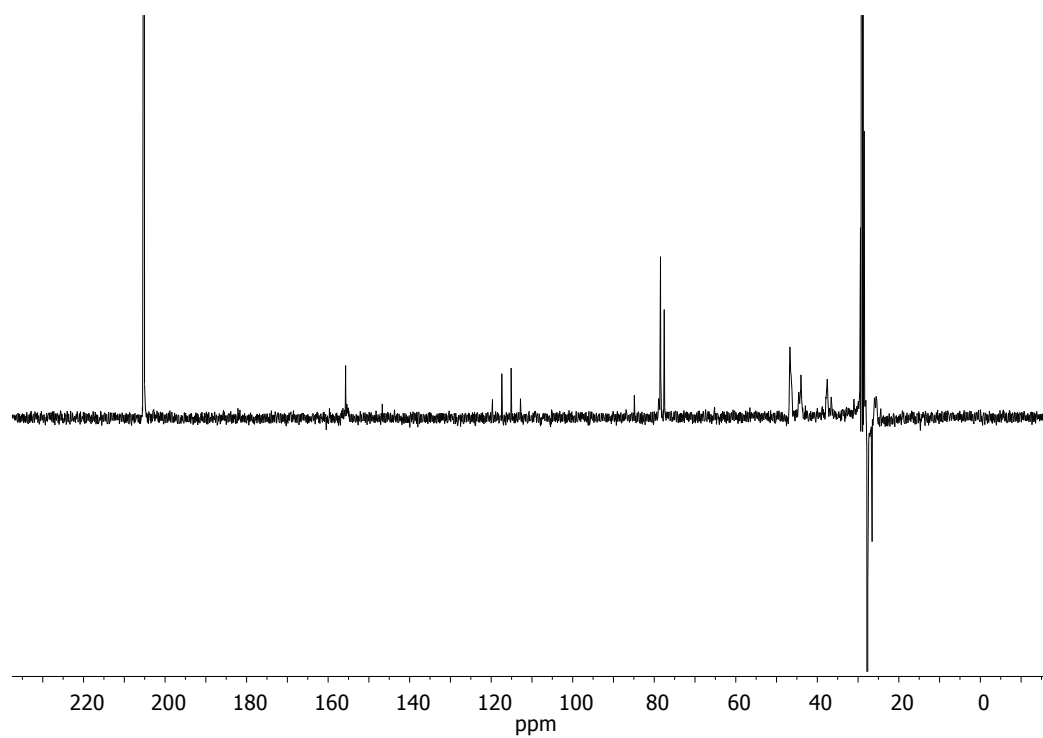

APT of compound **2-Tfa** in acetone- $d_6$

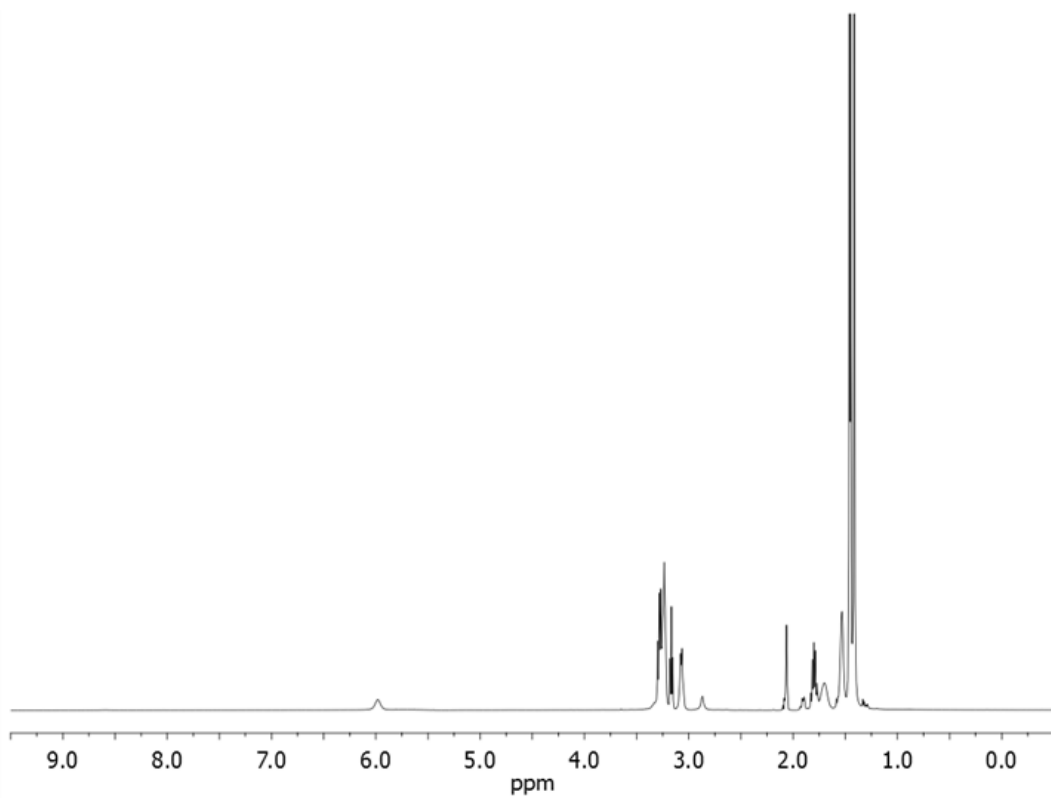

<sup>1</sup>H-NMR of compound **2** in acetone-*d*<sub>6</sub>

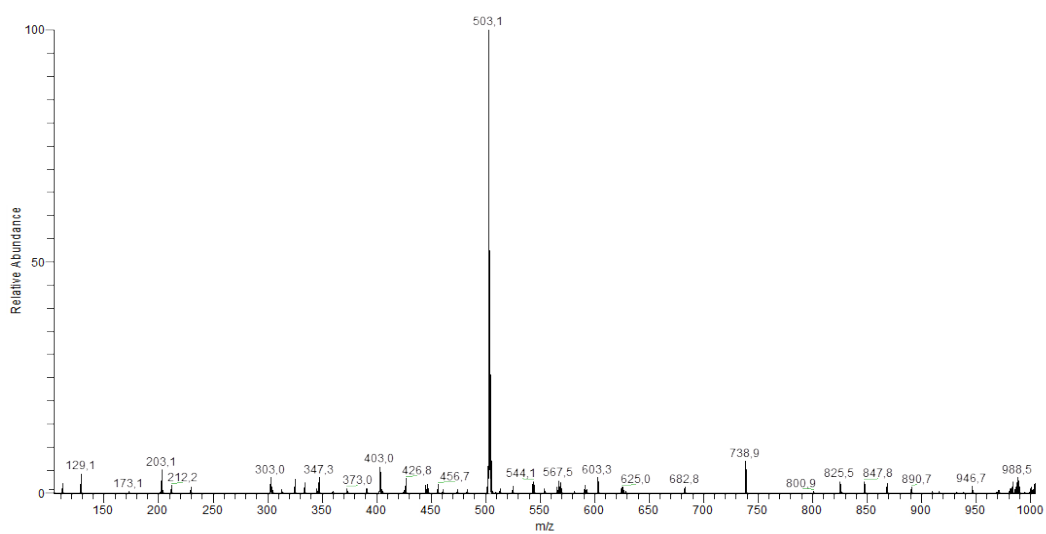

ESI-MS of compound **2**

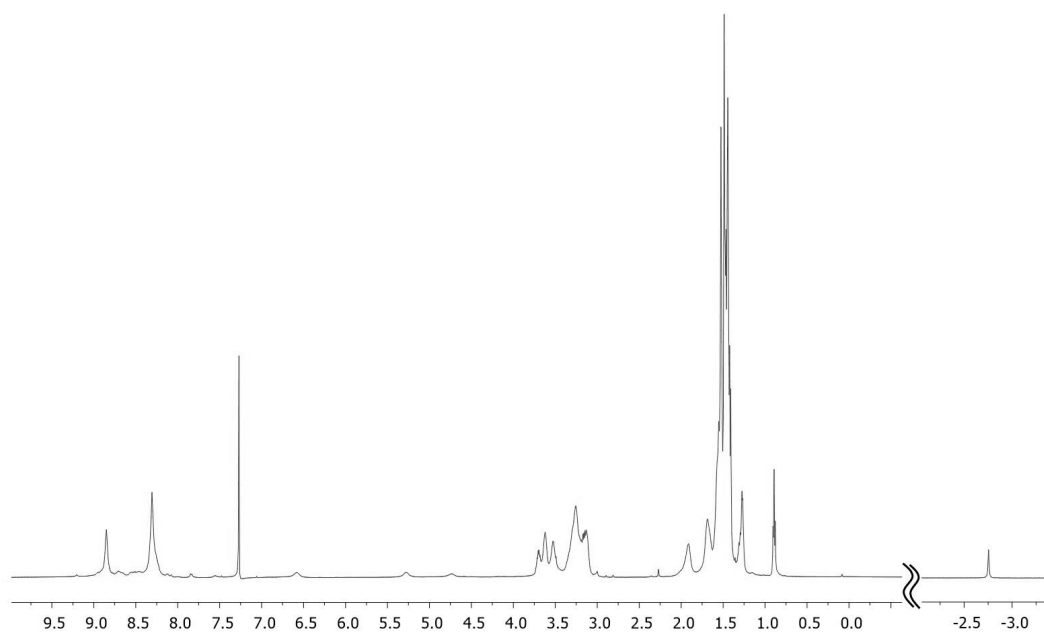

$^1\text{H}$ -NMR of compound **3** in  $\text{CDCl}_3$

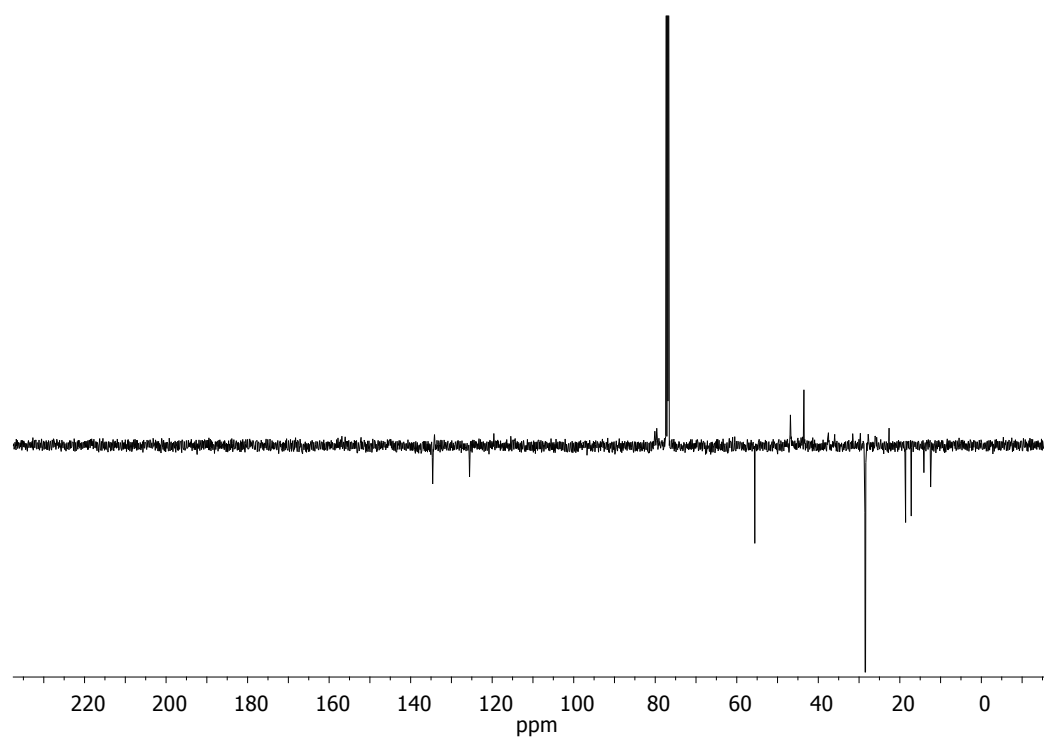

APT of compound **3** in  $\text{CDCl}_3$

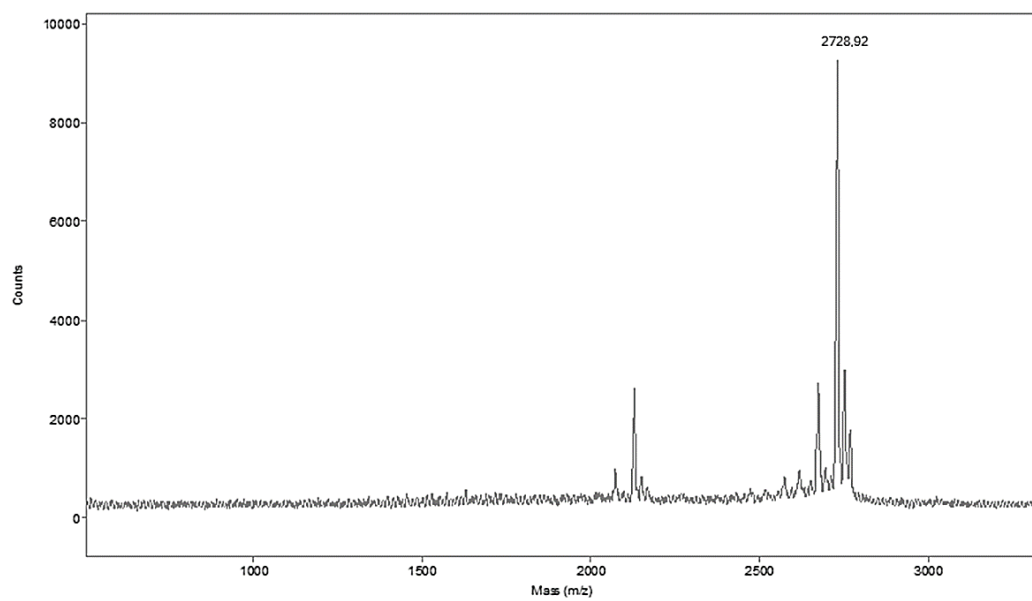

MALDI of compound **3**

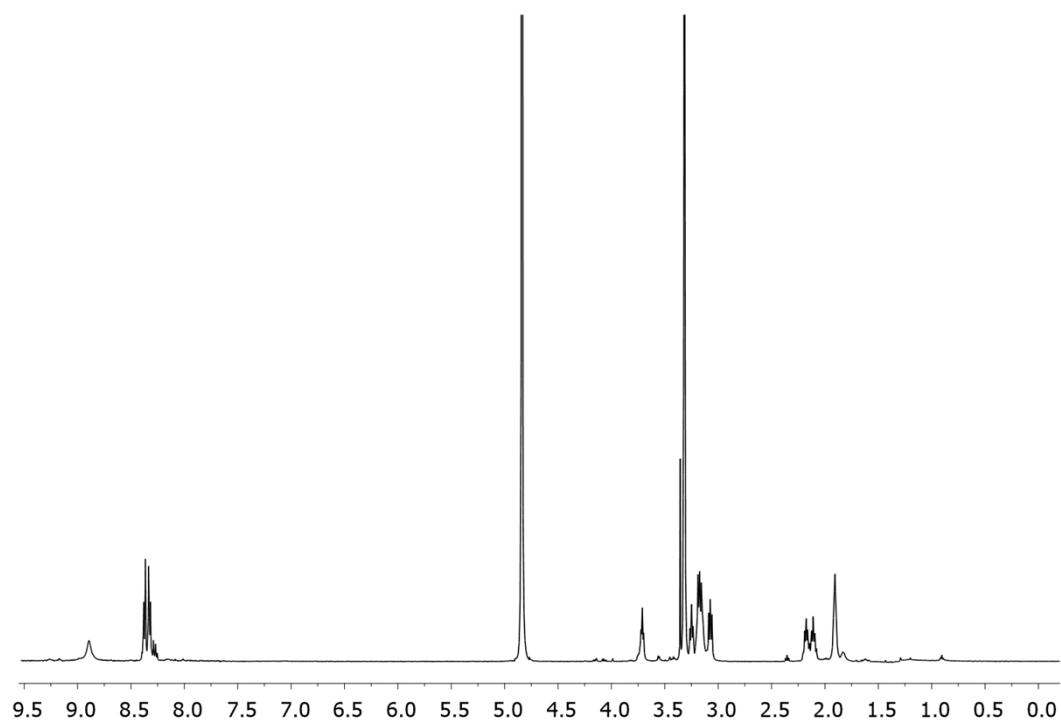

<sup>1</sup>H-NMR of compound **1** in CD<sub>3</sub>OD

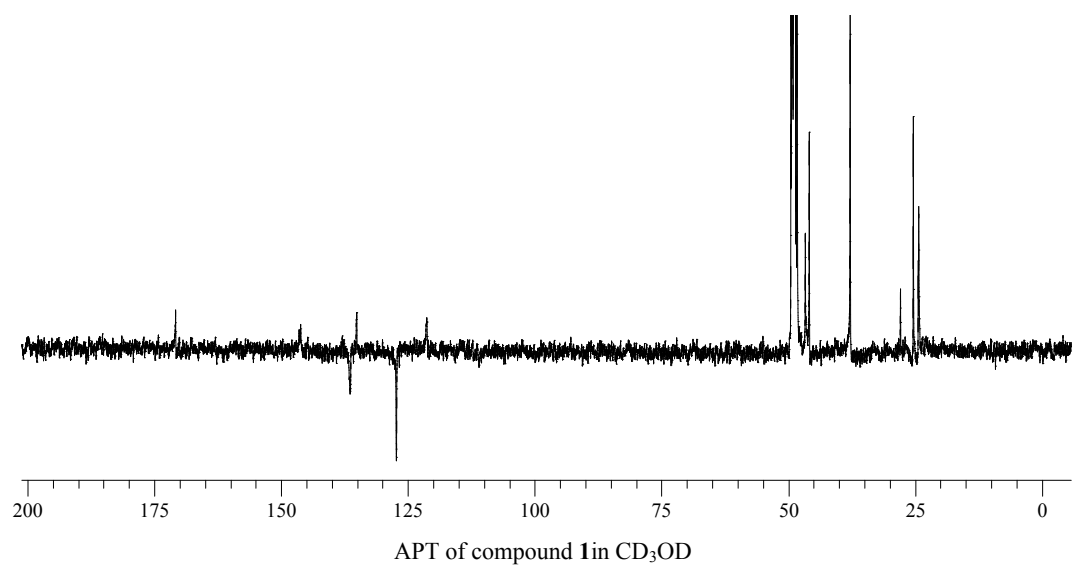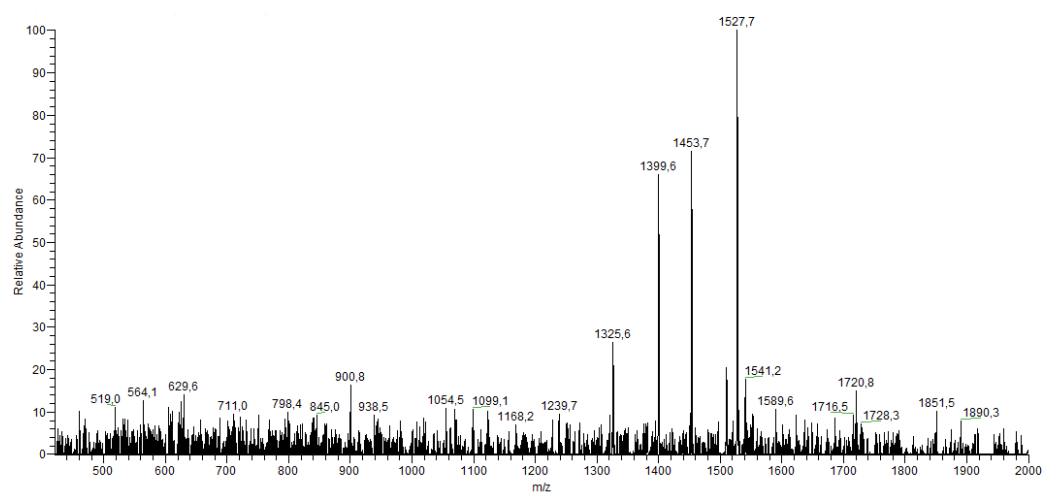

[1] a) Geall, A. J.; Blagbrough, I. S.; Tetrahedron, 2000, 56, 2449–2460. b) US2007197658A1.

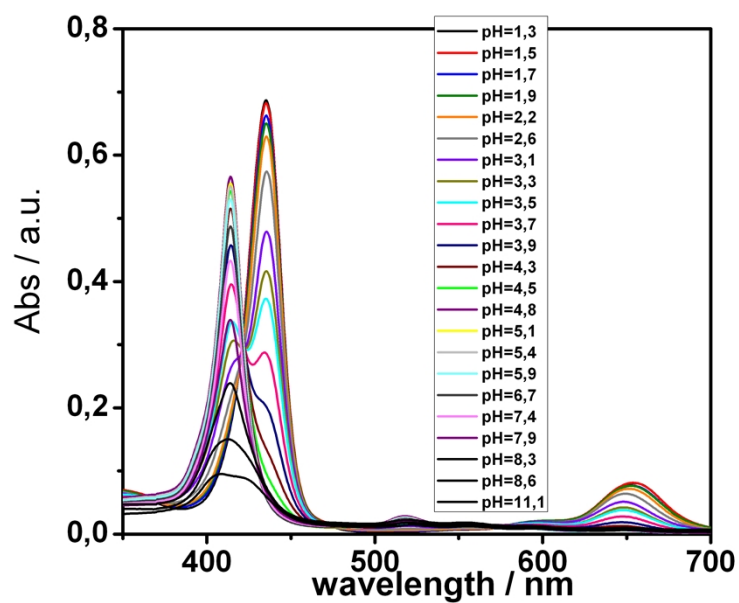

UV-vis spectra of a solution of  $H_2TCPPSpm4$  ( $2 \mu M$ ) increasing the pH from 1.3 to 11.1

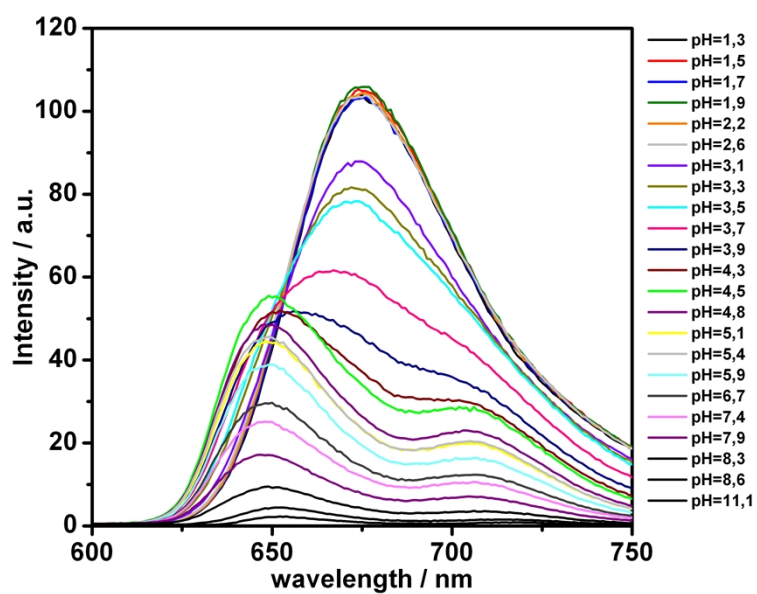

Fluorescence spectra of a solution of  $H_2TCPPSpm4$  ( $2 \mu M$ ) increasing the pH from 1.3 to 11.1. The  $\lambda_{ex}$  424 nm

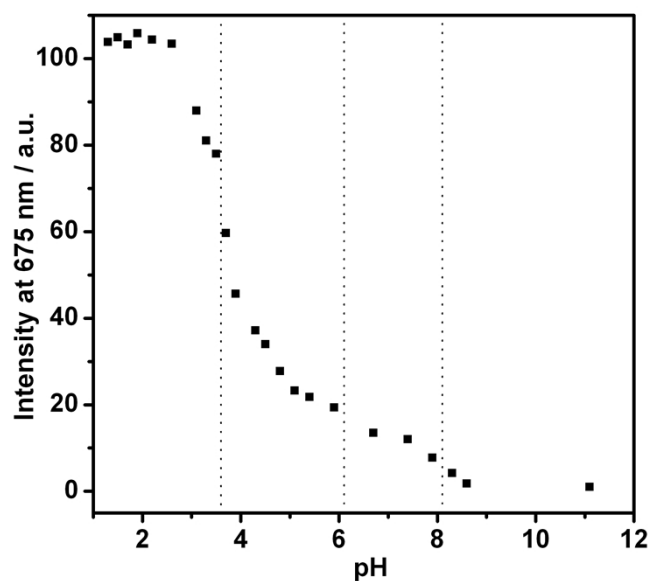

Fluorescence vs pH, for the continuous titration at 675 nm (solid black square), of 2  $\mu\text{M}$   $\text{H}_2\text{TCPPSpm4}$  solution.

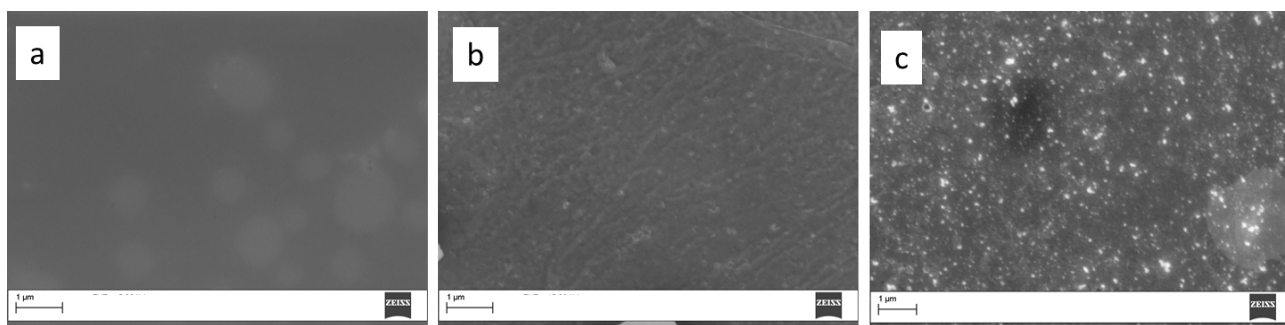

SEM images of  $\text{H}_2\text{TCPPSpm4}$  deposited on silicon by drop casting of 100  $\mu\text{l}$  of 100  $\mu\text{M}$  solution at pH=1,5 (a), pH=5 (b) and pH=8 (c)

SEM images show silicon surface after evaporation of 100  $\mu\text{l}$  of  $\text{H}_2\text{TCPPSpm4}$  aqueous solution (10  $\mu\text{M}$ ) at different pH. Clearly, working at pH 1,5 (a) the substrate surface doesn't reveal the presence of any aggregates, while a more structured surface is well evident upon increasing pH value. In particular, small spherical nanostructures are visible at pH 5 (b), while at pH 8 a high density of particles is well detectable (c).

EDS analyses of regions shown in (b) and (c) confirm the carbonaceous nature of such small nanostructures.

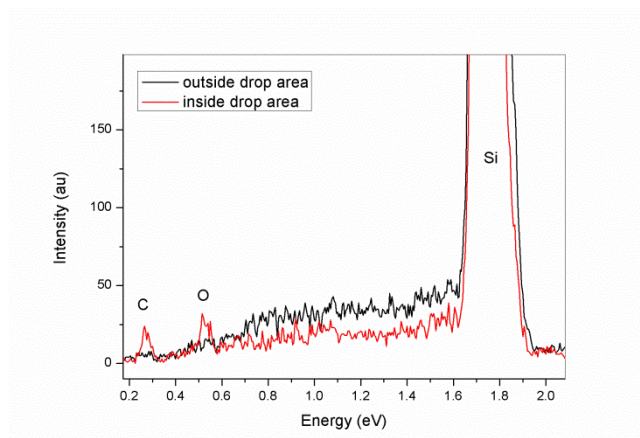

EDS spectra of silicon inside (red line) and outside (black line) the  $\text{H}_2\text{TCPP-Spm4}$  drop spot (1  $\mu\text{M}$ , pH=8).

Nanoaggregate dimensions (below tenth of nanometers) confirm the RLS measurements that have shown a signal associable to small aggregates, as expected by the use of extremely diluted solutions.
